# Supplementary material for: Temperature, strain and charge mediated multiple and dynamical phase changes of selenium and tellurium
Source: Royal Society of Chemistry journal article supplement (doi:10.1039/c9nr06069c), 2019-12-26
Supplement: c9nr06069c6.pdf [file c9nr06069c6.pdf]

# MD Results for bct-Te and bco-Te

Before

After

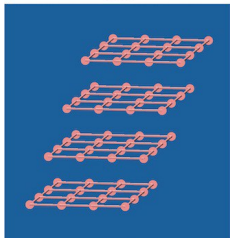

bct

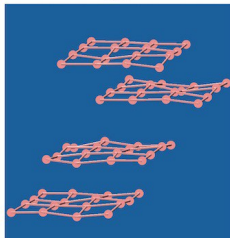

$q_y = \text{min}$ ,  $t=0$ ,  $T=400$  K

$q_y = \text{min}$ ,  $t=6$  ps,  $T=400$  K

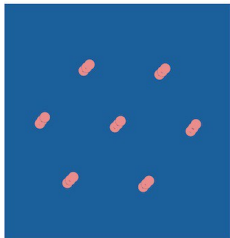

bco

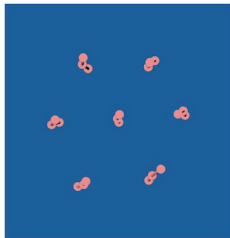

$q_y = \text{min}$ ,  $t=0$ ,  $T=300$  K

$q_y = \text{min}$ ,  $t=6$  ps,  $T=300$  K
