# Supplementary figures and images for: Temperature, strain and charge mediated multiple and dynamical phase changes of selenium and tellurium
Source: Royal Society of Chemistry journal article supplement (doi:10.1039/c9nr06069c), 2019-12-26

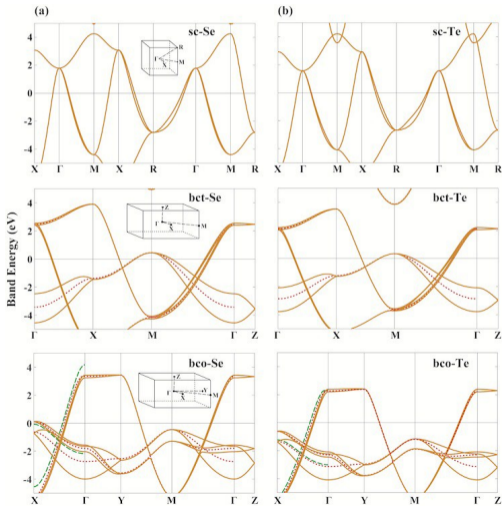

Supplement: c9nr06069c3.pdf [file c9nr06069c3.pdf]

### Charged Bands of Trigonal Se

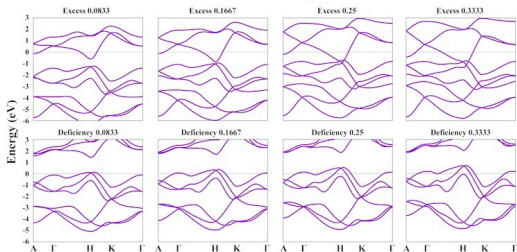

### Charged Bands of Trigonal Te

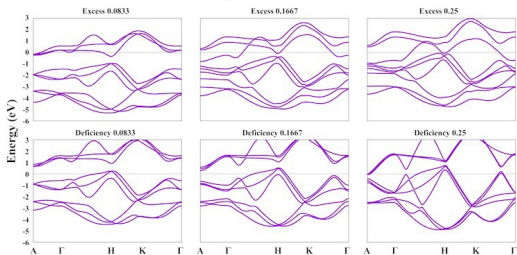

Supplement: c9nr06069c4.pdf [file c9nr06069c4.pdf]

MD Results for Charged sc-Te

Before

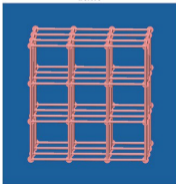

$q_s = -0.25$ ,  $t = 0$ ,  $T = 400$  K

After

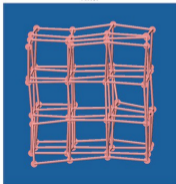

sc

$q_s = -0.25$ ,  $t = 6$  ps,  $T = 400$  K

Supplement: c9nr06069c5.pdf [file c9nr06069c5.pdf]
